# Supplementary material for: Cell-Free DNA Analysis by Whole-Exome Sequencing for Hepatocellular Carcinoma: A Pilot Study in Thailand
Source: MDPI journal article supplement (doi:10.3390/cancers13092229), 2021-05-06
Supplement: s1 [file s1]

## Supplementary code

### Trimmomatic: trimming of low quality read and adaptors

```
java -jar <path to trimmomatic.jar> PE [-threads <threads>] [-phred33 | -phred64] [-trimlog  
<logFile>] >] [-basein <inputBase> | <input 1> <input 2>] [-baseout <outputBase> |  
<unpaired output 1> <paired output 2> <unpaired output 2> <step 1> ...
```

### Next flow (Sarek version 2.5.2): Preprocessing step

```
nextflow run nf-core-sarek-2.5.2/workflow -profile singularity -with-singularity nf-core-sarek-2.5.2.simg -with-  
report -with-trace -with-dag flowchart.png --input input_file.tsv --max_memory xx.GB --max_cpus xx --tools  
Haplotypecaller,Strelka,Mutect2,FreeBayes,mpileup,TIDIT,Manta,ASCAT --acLoci '  
1000G_phase3_20130502_SNP_maf0.3.loci' --acLociGC '1000G_phase3_20130502_SNP_maf0.3.loci.gc' --  
bwaIndex 'human_g1k_v37_decoy.fasta.{amb,ann,bwt,pac,sa}' --chrDir '  
/GATK/GRCh37/Sequence/Chromosomes' --chrLength '  
/GATK/GRCh37/Sequence/Length/human_g1k_v37_decoy.len' --dbsnp  
'GATK/GRCh37/Annotation/GATKBundle/dbsnp_138.b37.vcf' --dbsnpIndex  
'GATK/GRCh37/Annotation/GATKBundle/dbsnp_138.b37.vcf.idx' --dict  
'GATK/GRCh37/Sequence/WholeGenomeFasta/human_g1k_v37_decoy.dict' --fasta  
'GATK/GRCh37/Sequence/WholeGenomeFasta/human_g1k_v37_decoy.fasta' --fastaFai  
'GATK/GRCh37/Sequence/WholeGenomeFasta/human_g1k_v37_decoy.fasta.fai' --germlineResource  
'GATK/GRCh37/Annotation/GermlineResource/gnomAD.r2.1.1.GRCh37.PASS.AC.AF.only.vcf.gz' --  
germlineResourceIndex  
'GATK/GRCh37/Annotation/GermlineResource/gnomAD.r2.1.1.GRCh37.PASS.AC.AF.only.vcf.gz.tbi' --intervals  
'GATK/GRCh37/Annotation/intervals/wgs_calling_regions_Sarek.list' --knownIndels  
'GATK/GRCh37/Annotation/GATKBundle/{1000G_phase1,Mills_and_1000G_gold_standard}.indels.b37.vcf' --  
knownIndelsIndex  
'GATK/GRCh37/Annotation/GATKBundle/{1000G_phase1,Mills_and_1000G_gold_standard}.indels.b37.vcf.idx' -  
-snpeffDb 'GRCh37.75' --vepCacheVersion '95' --species 'homo_sapiens' --genome GRCh37 --exome --targetBED  
GRCh37_S07604514_Regions.bed
```

### Create Somatic Panel of Normal

**Step 1.** Run Mutect2 in tumor-only mode for each normal sample.

```
gatk Mutect2 -R human_g1k_v37_decoy.fasta -I input_file.bam -max-mnp-distance 0 -O output_file.vcf.gz
```

**Step 2.** Create a GenomicsDB from the normal Mutect2 calls.

```
gatk GenomicsDBImport -R human_g1k_v37_decoy.fasta -L wgs_calling_regions_Sarek.list --genomicsdb-  
workspace-path pon_db -V input_file.vcf.gz
```

**Step 3.** Combine the normal calls using CreateSomaticPanelOfNormals.

```
gatk CreateSomaticPanelOfNormals -R human_g1k_v37_decoy.fasta -V gendb://pon_db -O pon.vcf.gz
```

### Mutect2: somatic mutation calling in tumor-normal mode

**Step 1.** Mutect2

```
gatk Mutect2 -R human_g1k_v37_decoy.fasta -I input_tumor_file.recal.bam -tumor LM3858cf -I
input_normal_file.recal.bam -normal LM3858gl --panel-of-normals pon.vcf.gz -O output_Mutect2_unfiltered.vcf.gz
--flr2-tar-gz flr2.tar.gz --native-pair-hmm-threads xx
```

## **Step 2. Learn Read Orientation Model**

```
gatk LearnReadOrientationModel -I flr2.tar.gz -O read-orientation-model.tar.gz
```

## **Step 3. Get Pileup Summaries of tumor and normal**

```
gatk GetPileupSummaries -I input_tumor_file.recal.bam -V gnomAD.r2.1.1.GRCh37.PASS.AC.AF.only.vcf.gz -L
wgs_calling_regions_Sarek.list -O output_tumor_file_pileups.table
```

```
gatk GetPileupSummaries -I input_normal_file.recal.bam -V gnomAD.r2.1.1.GRCh37.PASS.AC.AF.only.vcf.gz -L
wgs_calling_regions_Sarek.list -O output_normal_file_pileups.table
```

## **Step 4. Calculate Contamination**

```
gatk CalculateContamination -input_tumor_file_pileups.table -matched input_normal_file_pileups.table -tumor-
segmentation segments.table -O calculatecontamination.table
```

## **Step 5. Filter Mutect Calls**

```
gatk FilterMutectCalls -R human_g1k_v37_decoy.fasta -V input_Mutect2_unfiltered.vcf.gz --tumor-segmentation
segments.table --contamination-table calculatecontamination.table --ob-priors read-orientation-model.tar.gz -O
output_Mutect2_Filtered.vcf
```

## **Funcotator: Variants annotation**

### **Step 1. Data Source Downloader**

```
gatk FuncotatorDataSourceDownloader --somatic --validate-integrity --extract-after-download
```

### **Step 2. Filter pass**

```
vcftools --vcf input_Mutect2_Filtered.vcf --remove-filtered-all --recode --out pass_input_Mutect2_Filtered
```

### **Step 3. Running Funcotator in the GATK With Base Options**

```
gatk Funcotator --variant pass_input_Mutect2_Filtered.recode.vcf --reference human_g1k_v37_decoy.fasta --ref-
version hg19 --data-sources-path funcotator_dataSources.v1.6.20190124s --output
output_annotated_variants.funcotated.vcf --output-file-format VCF
```

## **cnvkit: Copy number analysis**

### **Step 1. Unmarking of duplicate read**

```
gatk UnmarkDuplicates -I .recal.bam -O .unmarked.bam
```

### **Step 2. Splitting of target file**

```
cnvkit.py target GRCh37_S07604514_Regions.bed --split -o GRCh37_S07604514_Regions_eq.bed
```

### **Step 3. CNV calling**

```
cnvkit.py batch input_tumor.unmarked.bam --normal input_normal.unmarked.bam --targets
GRCh37_S07604514_Regions_eq.bed --fasta human_g1k_v37_decoy.fasta --output-reference output.cnn --output-
dir pathToOutput/ --diagram --scatter -p xx --drop-low-coverage -m hybrid --annotate refFlat.txt -y -c
```

#### **Step 4. Preparing file for ginkgo**

```
samtools view -hb input_normal.unmarked.bam | bedtools bamtobed -i stdin | gzip >
output_normal.unmarked.bed.gz
samtools view -hb input_normal.unmarked.bam | bedtools bamtobed -i stdin | gzip >
output_normal.unmarked.bed.gz
```

#### **Nanopore sequencing analysis**

##### **Step 1. Guppy base caller on GPU**

```
guppy_basecaller -r -i path/to/input/fast5 -s path/to/output/fastq --kit code_ont_kit --flowcell code_ont_flowcell -x
"cuda:0 cuda:1" --disable_pings --qscore_filtering --min_qscore 8
```

##### **Step 2. Guppy barcoder**

```
guppy_barcode -t xx -r -I path/to/pass/fastq -s path/to/output --barcode_kits kit code_ont_barcode_kit
```

##### **Step 3. Mapping with human genome and sorting**

```
minimap2 -t XX -a -x map-ont /Homo_sapiens/UCSC/hg19/Sequence/WholeGenomeFasta/genome.fa
path/to/fastqfile "|" samtools sort -@XX -o output_aligned.sorted.bam ";" samtools index
output_aligned.sorted.bam
```

##### **Step 4. Preparing file for ginkgo: Convert file bam file to bed file**

```
samtools view -hb input_aligned.sorted.bam | bedtools bamtobed -i stdin | gzip > output_aligned.bed.gz
```
