# Supplementary material for: Cell-Free DNA Analysis by Whole-Exome Sequencing for Hepatocellular Carcinoma: A Pilot Study in Thailand
Source: Cancers (Basel). 2021 May 6;13(9):2229. doi: 10.3390/cancers13092229 (PMC8125351; doi:10.3390/cancers13092229)
Supplement: Supplementary file 1 [file cancers-13-02229-s001.zip › Supplementary Table .xlsx]

## Sheet: Table 1
Table 1 Baseline characteristics of 30 cfDNA from patients with HCC for Whole-exome sequencing
Baseline characteristics	HCC (n=30)
Sex (male,%)	25 (83.33)
Age, years	64.93 (51-86)
Laboratory data
Aspartate aminotransferase, IU/L	67.93 (11.0 - 151.0)
Alanine aminotransferase, IU/L	57.5 (11.0 - 152.0)
Serum albumin, g/dL	3.5 (2.2 - 4.4)
Total Bilirubin, mg/dL	1.2 (0.3 - 2.2)
Platelet, 103 cell/uL	190.6 (28.0 - 685.0)
Alpha-fetoprotein, IU/mL	8,102.9 (0.9 - 179,249.0)
Liver disease status
HBV infection	10 (33.33)
HCV infection	7 (23.33%)
HBV and HCV infection	1 (3.33%)
Non-viral infection	12 (40.00%)
Cirrhosis	19 (63.33%)
BCLC stage
A	9
B	12
C	9
Tumor number
Single	19
Multiple	11
Tumor size, cm
<5	14
³5	16
* mean (min - max) or count (%)

## Sheet: Supplementary S1
Supplementary table S1 Baseline characteristics of patients with HCC for cfDNA evaluation
Baseline characteristics	Mean±SD or N		p-value
	HCC (n=60)	CH (n=17)
Age	62.7±10.3	54.8±7.6	0.005*
Gender			0.699
Male	52	14
Female	8	3
Platelet (103 cell/uL)	186.6±116.3	226.6±42.1	0.031*
White blood cell (103 cell/uL)	6.3±2.7	6.7675±2.4	0.532432
Creatinine (mg/dL)	0.9±0.2	0.9±0.2	0.990296
Direct Bilirubin (mg/dL)	0.5±0.3	0.3±0.1	0.009*
Total Bilirubin (mg/dL)	0.9±0.6	0.7±0.3	0.037*
Albumin (g/dL)	3.6±0.6	4.2±0.4	< 0.001*
Aspartate aminotransferase (IU/L)	67.5±51.9	26.1±6.8	0.002*
Alanine aminotransferase (IU/L)	54.7±41.9	30.7±14.8	< 0.001*
Alkaline phosphatase (IU/L)	182.5±206.9	68.7±16.5	0.088594
Alpha-fetoprotein (IU/mL)		2.7±2.0
³20 IU/mL	28
<20 IU/mL	32
Tumor number
Single	34
Multiple	26
Tumor size (cm)	5.6±4.0
Cirrhosis			0.002*
Presence	43	3
Absense	17	14
Vascular invasion
Presence	16
Absense	44
BCLC stage
A	20
B	26
C	14
*Statisical significant

## Sheet: Supplementary S2
Supplementary table S2 Summary of 30 cfDNA whole-exome sequencing
Sample	Raw read	Passed Filter read	Mapped read	Percent mapped	Ins. size	≥ 30X	Coverage
LM3858	50246360	49850536	49557611	99.4124	165	0.618	55.5318
LM3858cf	40359858	40038130	39664621	99.0671	204	0.756	67.2224
LM3882	59992310	59487000	58996767	99.1759	167	0.639	69.1838
LM3882cf	42175108	41836792	41420918	99.006	218	0.799	79.2833
LM3883	46422946	46078696	45795987	99.3865	164	0.644	53.1515
LM3883cf	42684158	42335776	41953118	99.0961	198	0.71	64.8107
LM3889	61943704	61373734	61021364	99.4259	165	0.34	37.6187
LM3889cf	43792238	43397550	43123758	99.3691	210	0.179	17.8134
LM3895	65027056	64384800	63930373	99.2942	169	0.828	98.3066
LM3895cf	62126014	61453326	61021701	99.2976	200	0.829	111.18
LM3897	38995620	38571960	38335722	99.3875	162	0.371	25.3193
LM3897cf	50662556	50158436	49771887	99.2293	209	0.218	24.9199
LM3909	34024490	33684300	33377056	99.0879	166	0.312	18.9963
LM3909cf	37687296	37359530	37109371	99.3304	209	0.017	4
LM3912	52002188	51432440	51086413	99.3272	171	0.35	33.5991
LM3912cf	59401044	58748046	58327169	99.2836	204	0.056	7.3223
LM3914	43468898	43119922	42812152	99.2862	164	0.669	51.6173
LM3914cf	50365004	49931480	49362685	98.8608	200	0.676	73.3388
LM3918	50064548	49638886	49315993	99.3495	172	0.654	60.9611
LM3918cf	42522342	42171874	41764134	99.0331	204	0.745	69.7507
LM3921	44161998	43805590	43506151	99.3164	166	0.888	70.4742
LM3921cf	86601358	85862412	84999222	98.9947	205	0.687	131.548
LM3926	50502932	50090520	49695291	99.211	167	0.732	66.7577
LM3926cf	53050738	52622748	52077107	98.9631	209	0.752	89.9435
LM3930	66599848	66047090	65568841	99.2759	168	0.384	46.4833
LM3930cf	67281648	66572186	66008921	99.1539	209	0.165	25.0145
LM3937	38276952	37895590	37633241	99.3077	168	0.406	28.2076
LM3937cf	46095106	45663092	45358206	99.3323	217	0.198	21.4161
LM3940	54484578	53960016	53648138	99.422	171	0.382	38.5099
LM3940cf	42245518	41888574	41639444	99.4053	219	0.78	78.1632
LM3944	68459074	67932152	67339504	99.1276	166	0.713	87.5843
LM3944cf	51070850	50588344	50088716	99.0124	216	0.852	101.296
LM3946	68278218	67498254	67047368	99.332	169	0.36	44.826
LM3946cf	60203838	59495662	59104571	99.3427	216	0.835	117.144
LM3948	56798094	56304764	55945146	99.3613	172	0.864	91.3615
LM3948cf	69717906	68909350	68413438	99.2803	198	0.141	20.9886
LM3952	54879100	54442768	54019791	99.2231	170	0.693	69.9349
LM3952cf	46529618	46131396	45752715	99.1791	206	0.73	75.6076
LM3955	49110506	48713708	48362858	99.2798	170	0.759	68.5743
LM3955cf	57490504	56992992	56461988	99.0683	213	0.729	96.3434
LM3974	45929902	45498110	45192451	99.3282	169	0.676	56.7359
LM3974cf	75055408	74365526	73844963	99.3	214	0.267	46.3665
LM3984	90032402	89170304	88438618	99.1795	167	0.544	88.2909
LM3984cf	62643852	62084408	61610464	99.2366	208	0.549	77.3123
LM3994	43154046	42687836	42428429	99.3923	173	0.823	66.3837
LM3994cf	60765720	60031360	59627031	99.3265	207	0.123	16.6831
LM3997	68789978	68187610	67698281	99.2824	164	0.444	54.1705
LM3997cf	52414812	51935274	51471131	99.1063	209	0.151	17.8503
LM4002	34901966	34515660	34245407	99.217	168	0.396	25.036
LM4002cf	54314826	53745334	53390666	99.3401	210	0.023	5
LM4005	54625318	54176462	53837056	99.3735	167	0.719	71.0371
LM4005cf	50153288	49761128	49394511	99.2632	212	0.763	87.8006
LM4009	58713560	58124156	57768781	99.3886	168	0.789	84.1469
LM4009cf	55600782	54980392	54550846	99.2187	208	0.149	18.5785
LM4012	107407548	106182270	105293590	99.1631	172	0.357	71.0489
LM4012cf	49591716	49048960	48699366	99.2873	214	0.209	23.9355
LM4024	56280826	55767988	55456616	99.4417	173	0.511	53.874
LM4024cf	61741704	61112598	60750282	99.4071	217	0.139	20.1364
LM4027	54910232	54393766	54088977	99.4397	168	0.37	36.9469
LM4027cf	66642236	65910868	65456775	99.311	215	0.16	24.7441

## Sheet: Supplementary S3
Supplementary table S3 Summary of mutation types in 30 cfDNA from HCC patients
Sample	Frame_Shift_Del	Frame_Shift_Ins	In_Frame_Del	In_Frame_Ins	Missense_Mutation	Nonsense_Mutation	Nonstop_Mutation	Splice_Site	total
LM3948cf	15	3	18	0	755	8	0	19	818
LM3974cf	4	0	7	3	709	20	2	29	774
LM4005cf	3	2	1	1	412	8	0	19	446
LM3997cf	3	1	2	1	237	5	0	7	256
LM4009cf	3	1	2	0	230	2	0	4	242
LM3889cf	6	1	6	1	94	8	0	7	123
LM3921cf	3	1	3	0	52	4	0	5	68
LM4024cf	5	0	7	1	51	1	0	2	67
LM3937cf	8	0	4	3	44	0	1	4	64
LM3897cf	3	1	5	0	46	5	0	3	63
LM3984cf	11	1	8	0	38	1	0	3	62
LM3883cf	13	5	10	1	23	2	0	7	61
LM3858cf	10	7	10	3	18	3	0	8	59
LM3914cf	2	2	9	1	39	1	0	3	57
LM4012cf	6	1	0	0	41	1	0	2	51
LM4027cf	11	2	14	0	17	1	1	2	48
LM3930cf	7	2	12	0	17	1	0	5	44
LM3940cf	2	1	5	1	30	1	0	4	44
LM3946cf	1	2	5	0	25	1	0	2	36
LM3955cf	6	4	5	0	16	1	0	4	36
LM3895cf	10	0	3	1	16	1	0	2	33
LM3918cf	6	2	7	0	13	1	0	4	33
LM3952cf	5	2	6	0	10	0	0	6	29
LM3882cf	4	1	3	0	17	0	0	3	28
LM3909cf	2	0	3	0	18	1	0	3	27
LM3926cf	3	0	4	0	9	1	0	2	19
LM3994cf	4	0	4	0	7	0	0	1	16
LM3912cf	0	0	4	0	11	0	0	0	15
LM3944cf	0	0	0	0	3	0	0	1	4
LM4002cf	0	0	0	0	3	0	0	0	3

## Sheet: Supplementary S4
Supplementary table S4 Baseline characteristics of patients with HCC for SMURF-seq
Baseline characteristics	BLM1	BLM2	BLM3	BLM5	BLM6
Genders	Male	Male	Female	Male	Male
Sex	57	62	56	68	61
Aspartate aminotransferase, IU/L	23	49	150	35	295
Alanine aminotransferase, IU/L	20	182	141	33	335
Serum albumin, g/dL	4.2	3.3	3.6	4.8	3.2
Total Bilirubin, mg/dL	0.39	1.71	0.66	0.69	1.02
Platelet	244	125	265	221	180
Alpha-fetoprotein, IU/mL	2.95	2.84	2.03	676.48	3.58
Hepatitis viral infection	HCV	HBV	HBV	-	-
Cirrhosis	Yes	Yes	No	Yes	Yes
Tumor numbers	1	1	1	3	6
Tumor size, cm	2.3	3.5	2.7	8.8	8.2
BCLC stage	A	B	A	C	C
